# Supplementary material for: Pentafluorophenyl bonded phase separation: the assay of Australian antioxidant formulation of ascorbic acid, rutin and hesperidin
Source: Royal Society of Chemistry journal article supplement (doi:10.1039/c7ay01505d), 2017-01-01
Supplement: c7ay01505d1.pdf [file c7ay01505d1.pdf]

### Laboratory mixtures compositions

| <b>Mix. no.</b> | <b>ASC</b> | <b>RUT</b> | <b>HES</b> |
|-----------------|------------|------------|------------|
| 1               | 100        | 20         | 180        |
| 2               | 200        | 40         | 160        |
| 3               | 400        | 80         | 120        |
| 4               | 500        | 120        | 80         |
| 5               | 600        | 20         | 180        |
